# Supplementary material for: Immune Checkpoint Inhibitors in Oral Cavity Squamous Cell Carcinoma and Oral Potentially Malignant Disorders: A Systematic Review
Source: PubMed Central journal article supplement (PMC7409293; doi:10.3390/cancers12071937), 2020-07-17
Supplement: cancers-12-01937-s001.pdf [file cancers-12-01937-s001.pdf]

**Table S1.** Summary of inclusion criteria data from the included articles.

| #  | Author/Year                | Average age (yr) | Gender (M/F)  | Sample size | OSCC or OPMD  | Follow-up period | Specimen type    | Biomarker     | Detection method | Control                                    |
|----|----------------------------|------------------|---------------|-------------|---------------|------------------|------------------|---------------|------------------|--------------------------------------------|
| 1  | Aggarwal et al. 2017 [1]   | Not Specified    | Not Specified | 53          | OSCC          | Not Specified    | Peripheral blood | CTLA4         | Immunoblotting   | Age and sex-matched healthy tissue samples |
| 2  | Ahn et al. 2017 [2]        | 57.7 (23–84)     | 45/23         | 68          | OSCC          | 44.3 m           | FFPE             | PD-L1         | PCR + IHC        | Chorionic villi of human placenta          |
| 3  | Balermipas et al. 2017 [3] | 57               | 71/17         | 161         | OSCC          | 48 m             | FFPE             | PD-1 + PD-L1  | IHC              | -                                          |
| 4  | Bauml et al. 2017 [4]      | 61 (33–90)       | 138/33        | 171         | OSCC          | Not Specified    | Not Specified    | PD-L1         | Not Specified    | Not Specified                              |
| 5  | Bharti et al. 2013 [5]     | 50.6 (20–88)     | 117/13        | 130         | OSCC          | Not Specified    | Venous blood     | CTLA4         | PCR-RFLP         | Normal Tissue                              |
| 6  | Bhosale et al. 2017 [6]    | 49 (40–59)       | 299/93        | 481         | OPMD          | Not Specified    | FFPE and Frozen  | CD274 (PD-L1) | RT-qPCR          | Not Specified                              |
| 7  | Cai et al. 2019 [7]        | Not Specified    | 28/12         | 40          | OSCC          | Not Specified    | FFPE             | PD-L1         | IHC              | Normal mucosal tissues                     |
| 8  | Chen et al. 2015 [8]       | 51 (26–81)       | 190/28        | 218         | OSCC          | 31 m             | FFPE             | PD-L1         | IHC              | Not Specified                              |
| 9  | Chen et al. 2018 [9]       | 58.8             | 99/7          | 106         | OSCC          | Not Specified    | FFPE             | PD-L1         | IHC              | Not Specified                              |
| 10 | Chen et al. 2019 [10]      | 55 (24–79)       | 52/35         | 62          | OSCC and OPMD | Not Specified    | FFPE             | PD-L1         | IHC              | Normal tissue                              |
| 11 | Cho et al. 2011 [11]       | 59               | 32/13         | 45          | OSCC          | Not Specified    | FFPE             | PD-L1         | IHC              | Skeletal muscle tissue                     |
| 12 | Dong et al. 2017 [12]      | 60 (45–72)       | 15/5          | 20          | OSCC          | Not Specified    | Peripheral blood | Tim-3         | Cell sorting     | Normal tissue                              |
| 13 | Du et al. 2011 [13]        | 44.8 (23–72)     | 36/24         | 60          | OPMD          | Not Specified    | FFPE + Bloods    | PD-L1         | IHC, RT-PCR      | Normal tonsillar tissue                    |

|    |                            |                  |               |     |      |               |                   |               |                                                                                                       |                                                                            |
|----|----------------------------|------------------|---------------|-----|------|---------------|-------------------|---------------|-------------------------------------------------------------------------------------------------------|----------------------------------------------------------------------------|
| 14 | Falco et al. 2019 [14]     | 63 (36–84)       | 28/12         | 40  | OSCC | 6 m           | Not Specified     | PD-L1         | Not Specified                                                                                         | Not Specified                                                              |
| 15 | Fayette et al. 2017 [15]   | Not Specified    | 24/7          | 31  | OSCC | 442 days      | Not Specified     | Not Specified | Not Specified                                                                                         | Not Specified                                                              |
| 16 | Feldman et al. 2015 [16]   | 59.5 (19–90)     | 570/165       | 735 | OSCC | Not Specified | FFPE              | PD-1, PD-L1   | IHC                                                                                                   | protein specific controls                                                  |
| 17 | Ferris et al. 2017 [17]    | 60 (28–83)       | 300/61        | 361 | OSCC | 5.1 m         | Fresh or archived | PD-L1         | IHC                                                                                                   | Tumours treated with standard therapy (methotrexate, docetaxel, cetuximab) |
| 18 | Fiedler et al. 2017 [18]   | 60.5 (43.3–83.6) | 73/9          | 82  | OSCC | Not Specified | FFPE              | PD-1, PD-L1   | IHC + cell counting. High expression was classified as a minimum of 5% positivity among counted cells | Not Specified                                                              |
| 19 | Foy et al. 2017 [19]       | Not Specified    | Not Specified | 212 | OSCC | Not Specified | FFPE              | PD-L1         | IHC                                                                                                   | Three independent cohorts were used as validation cohorts                  |
| 20 | Gasparoto et al. 2010 [20] | 58.42 (41–96)    | Not Specified | 12  | OSCC | Not Specified | Fresh             | CD152 (CTLA4) | Flow cytometry                                                                                        | Aged matched healthy gingival tissue                                       |
| 21 | Ghapanchi et al. 2019 [21] | 39 (27–105)      | 14/90         | 104 | OPMD | Not Specified | Bloods            | PD-1          | Genotyping                                                                                            | Normal tissue                                                              |
| 22 | Goltz et al. 2017 [22]     | 61.9 (59.1–62.8) | 94/26         | 120 | OSCC | 32 (29–34) m  | FFPE              | PD-1          | RT-PCR                                                                                                | validation cohort                                                          |
| 23 | Groeger et al. 2016 [23]   | 61.5 (40–79)     | 12/3          | 15  | OSCC | Not Specified | FFPE, frozen      | B7-H1 (PD-L1) | IHC                                                                                                   | Non-tumour areas of sampled tissue                                         |
| 24 | Hanna et al. 2017 [24]     | 36 (15–45)       | 49/32         | 81  | OSCC | 74 m          | FFPE              | PD-L1         | IHC, Whole exome sequencing + genomic analysis                                                        | Not Specified                                                              |
| 25 | Hanna et al. 2017 [25]     | 57.5 (26–84)     | 23/11         | 34  | OSCC | 9 m           | Fresh             | PD-1, Tim3    | Flow cytometry                                                                                        | Isotype controls                                                           |

|        |                            |               |               |     |               |               |                         |                             |                             |                                              |
|--------|----------------------------|---------------|---------------|-----|---------------|---------------|-------------------------|-----------------------------|-----------------------------|----------------------------------------------|
| 2<br>6 | Jie et al. 2013 [26]       | 64.7 (40–83)  | 15/10         | 27  | OSCC          | Not Specified | Peripheral venous blood | PD-1, CTLA-4, Tim-3, Lag-3  | Flow cytometry              | Isotype controls                             |
| 2<br>7 | Kämmerer et al. 2010 [27]  | 63.8 (44–86)  | 59/24         | 83  | OSCC          | Not Specified | PBMCs                   | CTLA4                       | RT-PCR                      | Normal tissue                                |
| 2<br>8 | Katou et al. 2007 [28]     | Not Specified | Not Specified | 29  | OPMD          | Not Specified | Frozen                  | PD-1                        | IHC + PCR                   | Normal lingual mucosa                        |
| 2<br>9 | Larkins et al. 2017 [29]   | 60 (20–84)    | 139/35        | 192 | OSCC          | Not Specified | Not Specified           | PD-1                        | Not Specified               | Not Specified                                |
| 3<br>0 | Lecerf et al. 2019 [30]    | 56            | 77/19         | 96  | OSCC          | Not Specified | FFPE                    | PD-1, PD-L1, CTLA-4         | IHC, RT-qPCR                | Not Specified                                |
| 3<br>1 | Lechner et al. 2017 [31]   | 68 (49–85)    | 27/7          | 34  | OSCC          | Not Specified | FFPE, Peripheral blood  | PD-1, PD-L1, CTLA4          | Flow cytometry, IHC and PCR | Normal tissue                                |
| 3<br>2 | Leduc et al. 2017 [32]     | 54 (37–84)    | 14/7          | 21  | OSCC          | Not Specified | FFPE                    | PD-L1                       | IHC                         | Not Specified                                |
| 3<br>3 | Lin et al. 2015 [33]       | 56            | 236/69        | 305 | OSCC          | 3.8 years     | FFPE                    | PD-L1                       | IHC                         | Normal tonsil                                |
| 3<br>4 | Linedale et al. 2017 [34]  | 70.2          | 14/2          | 17  | OSCC          | Not Specified | FFPE, Peripheral blood  | PD-1, PD-L1, Tim3 and CTLA4 | Flow Cytometry and IHC      | Normal tissue                                |
| 3<br>5 | Malaspina et al. 2011 [35] | 58.42 (41–96) | 46/13         | 61  | OSCC and OPMD | Not Specified | Frozen tissue + Bloods  | PD-1 + PD-L1                | IHC, Flow cytometry         | Age matched normal tissue                    |
| 3<br>6 | Malm et al. 2015 [36]      | Not Specified | Not Specified | 451 | OSCC          | Not Specified | Peripheral blood        | PD-1, PD-L1 + Lag-3         | IHC, Flow cytometry         | Isotype controls                             |
| 3<br>7 | Maruse et al. 2018 [37]    | 64.0 (19–88)  | 70/27         | 97  | OSCC          | Not Specified | FFPE                    | PD-1, PD-L1                 | IHC                         | Staining with phosphate buffered saline only |
| 3<br>8 | Mattox et al. 2017 [38]    | Not Specified | Not Specified | 53  | OSCC          | Not Specified | FFPE                    | PD-L1                       | IHC-IF                      | Isotype controls                             |
| 3<br>9 | Moratin et al. 2019 [39]   | 64.3 (27–88)  | 105/70        | 175 | OSCC          | Not Specified | FFPE                    | PD-L1                       | IHC                         | Not Specified                                |
| 4<br>0 | Moreira et al. 2010 [40]   | 60            | 18/4          | 26  | OSCC          | Not Specified | FFPE                    | CTLA4                       | IHC                         | Omission of primary antibodies               |

|        |                                    |                                                                                         |                  |     |      |                                                                              |                          |                            |                        |                         |
|--------|------------------------------------|-----------------------------------------------------------------------------------------|------------------|-----|------|------------------------------------------------------------------------------|--------------------------|----------------------------|------------------------|-------------------------|
| 4<br>1 | Muller et al.<br>2017 [41]         | 1 <sup>st</sup> cohort<br>64.27 (38–<br>88). 2 <sup>nd</sup><br>cohort 62.41<br>(27–87) | 82/16<br>142/53  | 293 | OSCC | 1 <sup>st</sup> cohort<br>573.93 days.<br>2 <sup>nd</sup> cohort<br>856 days | FFPE                     | PD-L1                      | IHC                    | Not Specified           |
| 4<br>2 | Naruse et al.<br>2019 [42]         | 64                                                                                      | 65/56            | 121 | OSCC | Not<br>Specified                                                             | FFPE                     | PD-1, PD-L1                | IHC                    | Normal tissue           |
| 4<br>3 | Ngamphaiboon<br>et al. 2019 [43]   | 65 (28–89)                                                                              | 145/58           | 203 | OSCC | Not<br>Specified                                                             | FFPE                     | PD-L1                      | IHC                    | Not Specified           |
| 4<br>4 | Okada et al.<br>2018 [44]          | 65 (32–80)                                                                              | 23/3             | 26  | OSCC | 47 m                                                                         | FFPE                     | PD-L1                      | IHC                    | Not Specified           |
| 4<br>5 | Oliveira-Costa<br>et al. 2015 [45] | 61.8 (34–95)                                                                            | 92/100           | 180 | OSCC | 20 m                                                                         | Frozen                   | PD-L1                      | RT-qPCR, IHC           | Normal oral epithelium  |
| 4<br>6 | Pekiner et al.<br>2012 [46]        | 51.1                                                                                    | 9/21             | 30  | OPMD | Not<br>Specified                                                             | Peripheral<br>blood      | CTLA4                      | Flow cytometry         | Normal tissue           |
| 4<br>7 | Poropatich et<br>al. 2017 [47]     | 61.1                                                                                    | 19/7             | 30  | OSCC | Not<br>Specified                                                             | Frozen                   | PD-1,<br>CTLA4 and<br>TIM3 | Flow cytometry         | Normal tissue + Tonsil  |
| 4<br>8 | Quan et al. 2016<br>[48]           | 49.1                                                                                    | 17/5             | 22  | OSCC | Not<br>Specified                                                             | FFPE,<br>Frozen,<br>PBMC | Tim3, PD-1                 | IHC, Flow<br>cytometry | Matched PBMCs           |
| 4<br>9 | Rasmussen et<br>al. 2019 [49]      | Not<br>Specified                                                                        | 16/12            | 28  | OSCC | Not<br>Specified                                                             | FFPE                     | PD-L1                      | IHC                    | Not Specified           |
| 5<br>0 | Ryu et al. 2017<br>[50]            | 58                                                                                      | 296/97           | 393 | OSCC | Not<br>Specified                                                             | FFPE                     | PD-1                       | IHC                    | Not Specified           |
| 5<br>1 | Saâda-Bouzid<br>et al. 2017 [51]   | 63                                                                                      | 27/7             | 34  | OSCC | 10.3 m                                                                       | Not<br>Specified         | PD-1 PD-L1                 | Not Specified          | Not Specified           |
| 5<br>2 | Sablin et al.<br>2016 [52]         | 56                                                                                      | 77/19            | 96  | OSCC | 125 m (2.6d<br>– 236 m)                                                      | Frozen                   | PD-L1                      | IHC                    | Adjacent healthy tissue |
| 5<br>3 | Satgunaseelan<br>et al. 2017 [53]  | 65 (30–89)                                                                              | 130/87           | 217 | OSCC | 22 m (1 m-<br>12yrs)                                                         | FFPE                     | PD-L1                      | IHC                    | Not Specified           |
| 5<br>4 | Scognamiglio et<br>al. 2017 [54]   | Not<br>Specified                                                                        | Not<br>Specified | 96  | OSCC | Not<br>Specified                                                             | FFPE                     | PD-L1                      | IHC                    | Normal tonsil tissue    |

|   |                             |                                      |                          |     |      |               |                         |                           |                                |                            |
|---|-----------------------------|--------------------------------------|--------------------------|-----|------|---------------|-------------------------|---------------------------|--------------------------------|----------------------------|
| 5 | Seiwert et al. 2016 [55]    | 63 (20–83)                           | 49/11                    | 60  | OSCC | 14 m          | Not Specified           | PD-L1                     | IHC                            | Not Specified              |
| 5 | Shayan et al. 2017 [56]     | 61 (43–75)                           | 9/5                      | 14  | OSCC | Not Specified | Peripheral blood        | PD-L1, CTLA-4             | Flow cytometry                 | Isotype control            |
| 5 | Singh et al. 2017 [57]      | 52.25 (40–68)                        | 7/5                      | 12  | OSCC | Not Specified | Fresh                   | PD-L1                     | qPCR                           | Adjacent normal tissue     |
| 5 | Sridharan et al. 2016 [58]  | 59                                   | 18/2                     | 20  | OSCC | 14 m          | Peripheral blood        | PD-1, Tim3, PD-L1         | Flow cytometry, cytokine assay | Normal tissue              |
| 5 | Strati et al. 2017 [59]     | 65                                   | 75/19                    | 113 | OSCC | 18.9 m        | Peripheral blood        | PD-L1                     | RT-qPCR                        | Normal tissue              |
| 6 | Straub et al. 2016 [60]     | 57 (38–86)                           | 54/26                    | 80  | OSCC | 31 m (2-63 m) | FFPE                    | PD-1, PD-L1               | IHC, ISH                       | Normal tissue              |
| 6 | Strauss et al. 2017 [61]    | 58 (36–75)                           | 6/4                      | 10  | OSCC | Not Specified | Peripheral venous blood | CTLA-4                    | Flow cytometry                 | Aged matched normal tissue |
| 6 | Takahashi et al. 2019 [62]  | 69 (33–92)                           | 50/27                    | 77  | OSCC | Not Specified | FFPE                    | PD-L1                     | IHC                            | Not Specified              |
| 6 | Takakura et al. 2017 [63]   | nNAC 65 (32-81).<br>NAC = 71 (54-85) | NAC = 3/5,<br>nNAC = 4/6 | 18  | OSCC | Not Specified | FFPE                    | PD-1 + PD-L1              | IHC                            | Not Specified              |
| 6 | Troeltzsch et al. 2017 [64] | 61.34                                | 48/40                    | 88  | OSCC | Not Specified | FFPE                    | PD-L1                     | IHC                            | Tonsillar tissue           |
| 6 | Wang et al. 2019 [65]       | 67                                   | 20/16                    | 36  | OSCC | Not Specified | FFPE                    | PD-L1, TIM3, CTLA4, Lag-3 | IHC                            | Not Specified              |
| 6 | Weber et al. 2018 [66]      | 64.6 (35–93)                         | 29/16                    | 45  | OSCC | Not Specified | Fresh, Peripheral blood | PD-L1                     | RT-qPCR                        | healthy controls           |
| 6 | Wirsing et al. 2018 [67]    | 59                                   | 43/32                    | 75  | OSCC | Not Specified | FFPE                    | PD-L1                     | IHC, RT-qPCR                   | Not Specified              |
| 6 | Wong et al. 2006 [68]       | 51.4 (30–75)                         | 110/8                    | 118 | OSCC | 3 years       | Fresh                   | CTLA4                     | PCR                            | Patients without OSCC      |

|        |                                               |                  |                  |     |      |                  |                     |                     |                          |                                    |
|--------|-----------------------------------------------|------------------|------------------|-----|------|------------------|---------------------|---------------------|--------------------------|------------------------------------|
| 6<br>9 | Wu et al. 2017<br>[69]                        | Not<br>Specified | Not<br>Specified | 549 | OSCC | Not<br>Specified | FFPE                | PD-L1 and<br>CTLA4  | IHC                      | 43 normal oral mucosae             |
| 7<br>0 | Wu et al. 2019<br>[70]                        | Not<br>Specified | Not<br>Specified | 16  | OSCC | Not<br>Specified | Peripheral<br>blood | PD-1                | Flow cytometry           | Normal oral mucosa                 |
| 7<br>1 | Xu et al. 2019<br>[71]                        | Not<br>Specified | Not<br>Specified | 53  | OSCC | Not<br>Specified | FFPE                | PD-1, PD-L1         | IHC                      | Not Specified                      |
| 7<br>2 | Yagyuu et al.<br>2017 [72]                    | 62.6 (8-86)      | 42/78            | 120 | OPMD | 45.6 m           | Fresh               | PD-L1               | IHC                      | Tonsil                             |
| 7<br>3 | Yang et al. 2019<br>[73]                      | Not<br>Specified | Not<br>Specified | 279 | OSCC | Not<br>Specified | FFPE                | PD-1, Tim3,<br>Lag3 | IHC                      | 42 normal mucosa                   |
| 7<br>4 | Yoo et al. 2019<br>[74]                       | 59 (20–89)       | 114/44           | 158 | OSCC | 54.5 m           | FFPE                | PD-L1               | IHC                      | Isotype controls                   |
| 7<br>5 | Youngnak-<br>Piboonratanakit et al. 2004 [75] | 62.6 (27–64)     | 42/78            | 13  | OPMD | 45.6 m           | Fresh               | PD-1                | IHC                      | Isotype controls, normal<br>tissue |
| 7<br>6 | Zhou et al. 2012<br>[76]                      | 42 (22–65)       | 10/12            | 22  | OPMD | Not<br>Specified | Peripheral<br>blood | PD-1 and<br>PD-L1   | Flow cytometry,<br>ELISA | healthy patients                   |

Abbreviations: oral cavity squamous cell carcinoma (OSCC), fixed formalin paraffin imbedded (FFPE), immunohistochemistry (IHC), oral leukoplakia (OLK), polymerase chain reaction (PCR), real time quantitative PCR (RT-qPCR) restriction fragment length polymorphism (RFLP), in situ hybridization (ISH), immunofluorescence (IF), tumour infiltrating lymphocyte (TIL), peripheral blood mononuclear cell (PBMC), neoadjuvant chemotherapy (NAC), non-neoadjuvant chemotherapy (nNAC).

**Table 2.** Summarized results of included articles.

| # | Author/Year                | Pattern of expression                                                                                                                                                                                                                                                                                        | Main findings                                                                                                                                                                                    |
|---|----------------------------|--------------------------------------------------------------------------------------------------------------------------------------------------------------------------------------------------------------------------------------------------------------------------------------------------------------|--------------------------------------------------------------------------------------------------------------------------------------------------------------------------------------------------|
| 1 | Aggarwal et al. 2017 [1]   | CTLA-4 Tregs exhibited a higher prevalence in the peripheral circulation compared to normal controls                                                                                                                                                                                                         | CTLA-4 is an important functional marker of Tregs.                                                                                                                                               |
| 2 | Ahn et al. 2017 [2]        | High PD-L1 expression was a favourable prognostic factor for overall survival only in the miR-197 high subgroup                                                                                                                                                                                              | PD-L1 expression on IHC is associated with increased TILs and favourable prognosis in miR-197 high subgroup                                                                                      |
| 3 | Balermipas et al. 2017 [3] | PD-1 expression was defined as being low in 88 patients and high in 73 patients                                                                                                                                                                                                                              | PD-L1 in CD8 cells represents a promising prognostic marker and could be used to guide treatment with PD-1/PD-L1 inhibitors                                                                      |
| 4 | Bauml et al. 2017 [4]      | 17% of patients with PD-L1 expression of >1% of tumour cells responded to treatment with nivolumab                                                                                                                                                                                                           | pembrolizumab exhibited clinically significant antitumor activity and an acceptable safety profile in heavily pretreated OSCC                                                                    |
| 5 | Bharti et al. 2013 [5]     | High frequency of 1661G allele and AG genotype may be related to increased risk while low frequency of A allele suggests it to be protective in patients with tobacco related OSCC                                                                                                                           | Association between several polymorphisms in CTLA-4 gene and OSCC supports the role of immune/inflammatory molecules in the susceptibility to tobacco-related OSCC                               |
| 6 | Bhosale et al. 2017 [6]    | CD274 expression was amplified in OSCC compared to normal tissue. CD274 was dysregulated in OSCC compared to leukoplakia                                                                                                                                                                                     | CD274 and its ligand PD-1 are important targets of immunotherapy in OSCC                                                                                                                         |
| 7 | Cai et al. 2019 [7]        | PD-L1 was positive in 58% of tumour samples, compared to 0% in normal mucosa. In the tumour samples, PD-L1 was found to localize to cell membrane and cytoplasm and was highly expressed in poorly differentiated tumours. However, PD-L1 was weakly expressed in well and moderately differentiated tumours | anti-PD-1 mAb may have better tumour permeability due to its smaller molecular weight.<br>It may be more efficacious in poorly differentiated OSCCs with PD-L1 higher expression.                |
| 8 | Chen et al. 2015 [8]       | Patients with both necrosis and positive PD-L1 expression in OSCC surrounding necrosis had worse outcome and disease control                                                                                                                                                                                 | The aggressive behaviour of advanced OSCC could be related to PD-L1 immune escape, therefore patients with positive tumour PD-L1 expression may be good candidates for anti-PD-L1 immunotherapy. |
| 9 | Chen et al. 2018 [9]       | 72 samples were PD-L1 positive and 34 were PD-L1 negative. Positive p16INK4A expression was significantly higher and the mean age of patients was significantly higher in the group exhibiting positive expression of PD-L1 compared with the negative group.                                                | This study identified an association between PD-L1 and p16INK4A expression in non-OPHNSCC                                                                                                        |

|    |                          |                                                                                                                                                                                                                                                           |                                                                                                                                                                                                                                                                                               |
|----|--------------------------|-----------------------------------------------------------------------------------------------------------------------------------------------------------------------------------------------------------------------------------------------------------|-----------------------------------------------------------------------------------------------------------------------------------------------------------------------------------------------------------------------------------------------------------------------------------------------|
| 10 | Chen et al. 2019 [10]    | PD-L1 was significantly associated with the OSCC pathological grade, and higher PD-L1 staining was observed in OSCC compared to OLK                                                                                                                       | PD-L1 expression in OSCC and OLK was closely associated with disease progress and CD8+ TILs                                                                                                                                                                                                   |
| 11 | Cho et al. 2011 [11]     | PD-L1 expression on OSCC cells was observed in 87% of cases. The staining patterns were membranous and/or cytoplasmic. The density of intratumoral CD8+ T lymphocytes showed a significant inverse correlation with the PD-L1 expression of tumour cells  | The association between PD-L1 and CD8 T cells+ may be relevant to the PD-L1/PD-1 interactions resulting in the negative regulation of activated T-cells. PD-L1 expression was also correlated with the histological grade of the tumours                                                      |
| 12 | Dong et al. 2017 [12]    | Tim-3+ monocytes suppressed IFN- $\gamma$ secretion in CD8+ T cells                                                                                                                                                                                       | Blocking Tim-3 and/or Gal-9 could inhibit the Tim-3/Gal-9-mediated suppression of monocytes in vitro                                                                                                                                                                                          |
| 13 | Du et al. 2011 [13]      | PD-L1 was abundantly expressed on keratinocytes and slightly on the infiltrate T cells in the subepithelium                                                                                                                                               | PD-L1 was abundantly expressed in most OLP cases. PD-L1 mRNA levels in OLP patients' mucosa and blood were 1.43- and 0.62-fold compared to the control                                                                                                                                        |
| 14 | Falco et al. 2019 [14]   | Not Specified                                                                                                                                                                                                                                             | 22 patients achieved clinical benefit. Partial response seen in 10, stable disease 9, Complete response in 3 patients. For those with high PD-L1 expression, single-agent pembrolizumab also improves overall survival compared with Cetuximab plus chemotherapy.                             |
| 15 | Fayette et al. 2017 [15] | Not Specified                                                                                                                                                                                                                                             | Cabazitaxel gave a signal of activity OSCC but was toxic. In future studies, Cabazitaxel could be used at 20 mg/m <sup>2</sup> every 3 weeks or weekly at a lower dose like Paclitaxel or Docetaxel.                                                                                          |
| 16 | Feldman et al. 2015 [16] | PD-1: 125/182 altered expression. PD-L1: 32/183 altered expression. PD-1-positive TILs were detected in a range of 65% to 72%, across disease stages. Both PD-1-positive TILs and PD-L1-positivity in tumour cells was found across primary disease sites | The data supports the use of agents in clinical trials (PIK3CA, PD-1/PDL1), combination strategies (PIK3CA1/EGFR), or agents approved for other solid tumours (MGMT, HER2). We propose a comprehensive molecular profiling approach to enhance personalized therapy options for OSCC.         |
| 17 | Ferris et al. 2017 [17]  | Tumour PD-L1 expression status could be evaluated in 260 of 361 patients (72.0%). 57.3% of evaluated patients had a tumour membrane PD-L1 expression level of 1% of cells per field of view (minimum 100 cells) or more.                                  | Exploratory biomarker analysis indicated that patients who were treated with nivolumab had an average of 4.83 months longer overall survival than those treated with standard therapy, regardless of tumour PD-L1 expression, and nivolumab-treated patients had a risk of death that was 30% |



|    |                            |                                                                                                                                                                                                                                                                      |                                                                                                                                                                                                                                                                                                                                         |
|----|----------------------------|----------------------------------------------------------------------------------------------------------------------------------------------------------------------------------------------------------------------------------------------------------------------|-----------------------------------------------------------------------------------------------------------------------------------------------------------------------------------------------------------------------------------------------------------------------------------------------------------------------------------------|
|    |                            |                                                                                                                                                                                                                                                                      | lower than the risk among patients assigned to standard therapy                                                                                                                                                                                                                                                                         |
| 18 | Fiedler et al. 2017 [18]   | 43 Low 39 high PD-1 expression. 50 low 31 high PD-L1 expression. 33 low 48 high PD-L1 TI positive TILs. 39 samples showed high PD-1 expression. High PD-L1 expression of tumour cells was found in 31 samples and 48 samples showed a high expression of PD-L1+ TILs | Results show a nearly significant association between PD-L1 expression in tumour cells and complete tumour response upon irradiation (77.4% high PD-L1 showed complete response vs 54.0% of low PD-L1 expression). PD-L1 was expressed in 40% of patients indicating radiosensitivity and favourable survival in this group of patients |
| 19 | Foy et al. 2017 [19]       | PD-L1 was overexpressed in never smokers/drinkers compared to smokers/drinkers and in never smokers/drinkers at protein level. PD-L1-positive immune cells were mostly adjacent to tumour cells expressing PD-L1.                                                    | OSCC in never smokers/drinkers are characterized by an enrichment of PD-1 pathways, a higher intratumor T-cell infiltrate, an overexpression of IDO1 and PD-L1, and higher score of response signature to pembrolizumab                                                                                                                 |
| 20 | Gasparoto et al. 2010 [20] | 39.3 ± 7.1% of gated CD4+CD25+ T cells expressed CTLA-4.                                                                                                                                                                                                             | The results confirm that CD4+CD25+ T cells, but not CD4+CD25- T cells, from OSCC patients have potent inhibitory consequences on T effector function and promote the generation of IL-10                                                                                                                                                |
| 21 | Ghapanchi et al. 2019 [21] | At position PD-1.3, the genotype of GG was present in 80.8%, while the genotypes of GA and AA were found in 13.7% and 5.5% patients. The most prevalent genotype among patients was CT heterozygote.                                                                 | Polymorphism of PD-1.3 and PD-1.5 genes did not have any significant correlation with OLP susceptibility                                                                                                                                                                                                                                |
| 22 | Goltz et al. 2017 [22]     | 80 patients had high mPD-1 expression, 40 had low mPD-1 expression. mPDCD1high was associated with shorter overall survival                                                                                                                                          | mPDCD1 might potentially serve as a predictive biomarker for the response to immunotherapies targeting the PD-1/PD-L1 axis                                                                                                                                                                                                              |
| 23 | Groeger et al. 2016 [23]   | All 15 oral squamous cell carcinomas investigated showed a positive expression of the PD-L1 receptor in the cancerous areas                                                                                                                                          | The 5-year survival rate of the patients whose tissues were positive for PD-L1 expression, was 73.33 % (11 of 15). Expression of PD-L1 may be a prognostic marker in oral squamous cell carcinomas.                                                                                                                                     |
| 24 | Hanna et al. 2017 [24]     | Immunohistochemistry for tumoral PD-L1 in a subset of female patients revealed that 86.9% had >10% (range 0–100%) expression on tumour cells, with higher rates of membranous vs. cytoplasmic staining. PD-L1 expression on TILs was negligible                      | Female OSCC patients with greater membranous PD-L1 positivity and the presence of TILs showed a decreased risk of recurrence and improved survival, hazard ratio 0.58, p<0.001                                                                                                                                                          |
| 25 | Hanna et al. 2017 [25]     | A subgroup of tumours with an inflamed immune composition characterized by a robust CD8+ T cell infiltrate with high checkpoint co-expression (PD-1/TIM3+) independent of HPV or                                                                                     | Recurrent/metastatic OSCC patients with an inflamed immunophenotype treated with single agent PD-1 blockade appeared to benefit                                                                                                                                                                                                         |

|    |                           |                                                                                                                                                                                                                                                                                            |                                                                                                                                                                                                     |
|----|---------------------------|--------------------------------------------------------------------------------------------------------------------------------------------------------------------------------------------------------------------------------------------------------------------------------------------|-----------------------------------------------------------------------------------------------------------------------------------------------------------------------------------------------------|
|    |                           | smoking status. Recurrent/metastatic OSCC demonstrated improved survival in those patients with tumours exhibiting >1% PD-L1 expression                                                                                                                                                    |                                                                                                                                                                                                     |
| 26 | Jie et al. 2013 [26]      | CTLA-4 and CD39 are co-expressed on the majority of intratumoral FOXP3+ Tregs                                                                                                                                                                                                              | The frequency of cells expressing CTLA-4, TIM-3 and PD-1 is significantly increased on intratumoral Tregs compared with circulating Tregs                                                           |
| 27 | Kämmerer et al. 2010 [27] | A significant difference was found for CTLA-4 1661 A/G genotype between the patients and the controls (30.1% vs 10.0%) but not for CTLA-4 +49 A/G.                                                                                                                                         | Potential for treating OSCC patients by targeting the CTLA-4 -1661 A/G genotype, expressed in approximately 3x more tumour samples than in controls.                                                |
| 28 | Katou et al. 2007 [28]    | Intraepithelial CD8+ TILs express PD-1 at a high rate, and the stromal CD8+ TILs, as well as CD8+ T cells in OLP, express PD-1 at low rates. Expression of PD-1 in OLP $\sim 100 \times 10^{-5}$ , tongue cancer $\sim 500 \times 10^{-5}$ , compared to normal $\sim 10 \times 10^{-5}$ . | High expression rate of PD-1 by the intraepithelial CD8+ TILs suggests their exhausted functions                                                                                                    |
| 29 | Larkins et al. 2017 [29]  | Not Specified                                                                                                                                                                                                                                                                              | Accelerated approval expands the FDA-approved indications for pembrolizumab for the treatment of recurrent or metastatic OSCC with disease progression on or after platinum-containing chemotherapy |
| 30 | Lecerf et al. 2019 [30]   | 85 tumours overexpressed at least one of TIGIT, CTLA4, PD-1/PD-L1 and OX40/OX40L and 33 tumours simultaneously overexpressed them all. No tumour exclusively overexpressed PD-1 or OX40. PD-L1 was exclusively overexpressed in only one sample                                            | PD-1 overexpression was associated with good prognosis, whereas low mRNA levels of PD-1 correlated with poor prognosis and high risk of recurrence                                                  |
| 31 | Lechner et al. 2017 [31]  | Significantly higher rate of PD-1 and CTLA-4 expression on TILs. The percentage of PD-1, PD-L1 and CTLA-4 expressing circulating T cells was increased in OSCC patients compared to healthy donors, indicating elevated proportions of regulatory or exhausted T-cell phenotypes           | Results demonstrate elevated proportions of regulatory or exhausted T-cell phenotypes in OSCC patients compared to healthy controls, with 3.7% of total cells compared to 1.6%, respectively        |
| 32 | Leduc et al. 2017 [32]    | A significant increase in PD-L1 expression was observed in both tumour and immune cells post-TPF induction chemotherapy, with increases from 9.5% positivity prior to treatment compared to 38% positivity at the 5% cut-off level                                                         | Results suggest combination strategies of concomitant administration of cytotoxic therapies and anti-PD-1/PD-L1 therapies might be relevant for OSCC                                                |
| 33 | Lin et al. 2015 [33]      | High PD-L1 cytoplasm intensity was more likely in tumours from female than from male patients. High expression levels of PD-L1 were also more likely to occur in tumours from female                                                                                                       | High PD-L1-expression was significantly associated with distant metastasis and poor prognosis in male patients and smoking patients Results suggest patients with high PD-L1                        |

|    |                            |                                                                                                                                                                                                                                                                                                                    |                                                                                                                                                                                                                                                                                                                                                                                                                              |
|----|----------------------------|--------------------------------------------------------------------------------------------------------------------------------------------------------------------------------------------------------------------------------------------------------------------------------------------------------------------|------------------------------------------------------------------------------------------------------------------------------------------------------------------------------------------------------------------------------------------------------------------------------------------------------------------------------------------------------------------------------------------------------------------------------|
|    |                            | than from male patients. High PD-L1 expression is an independent risk factor in males (hazard ratio = 1.556) and smokers (hazard ratio = 2.058)                                                                                                                                                                    | expression had poor clinical outcome (hazard ratio = 2.74) and might require PD-L1-targeted immunotherapy to improve their prognosis                                                                                                                                                                                                                                                                                         |
| 34 | Linedale et al. 2017 [34]  | Amongst the CD8 infiltrate, the frequency of PD-1, CTLA-4 and Tim-3 expressing cells was significantly elevated in tumour relative to the blood across the patient                                                                                                                                                 | Results suggests an enrichment of PD-1+ CD8 T cells in perineural tumour tissue relative to blood and that Tim-3 expressing T cells are enriched in perineural tumour and might be good candidates for targeted antibody therapy                                                                                                                                                                                             |
| 35 | Malaspina et al. 2011 [35] | Numbers of CD8 T cells expressing PD-1 were significantly higher in OSCC patients than in control subjects. OSCC tumour samples contained elevated expression of PD-1 and present higher number of CD4+ PD-1+ T cells when compared with tissue from actinic cheilitis patients                                    | PD-1 and PD-L1 molecules are present in different phenotypes of lymphocytes in blood actinic cheilitis and OSCC. High PD-1 expression in CD4+ (43%) and CD8+ (68%) T cells may be used as a potential prognostic marker in oral tumours or in pre-malignant lesions                                                                                                                                                          |
| 36 | Malm et al. 2015 [36]      | Abundant PD-1 expression on CD4 and CD8 T cells at all sites, significantly higher than Lag-3. PD-1 was expressed at some level on both CD4 and CD8 T cells in all samples. 11% of analysed tumours were PD-L1 negative, 56% had regional expression, and 44% had diffuse expression with infiltrating lymphocytes | PD-1 is expressed on T cells from HPV-negative patients with OSCC and the abundance of its ligand in tumour tissue between 44-56%.                                                                                                                                                                                                                                                                                           |
| 37 | Maruse et al. 2018 [37]    | PD-L1 and PD-1 expression was not observed in the adjacent non-malignant oral epithelium. Increased expression of PD-L1 and PD-1 was significantly associated with 3.67 times greater incidence of cervical lymph node metastasis                                                                                  | Patients with PD-L1-positive expression had a significantly more unfavourable outcome than those with PD-L1-negative expression (69.2% vs 91.0% 5 year survival). The co-expression of PD-L1 and PD-1 is predictive of a poor prognosis in OSCC patients. PD-L1 expression in cancer cells is more critical than PD-1 expression in the infiltrating inflammatory cells in the prediction of the prognosis of OSCC patients. |
| 38 | Mattox et al. 2017 [38]    | 42/42 samples expressed PD-L1 at >1% of membranous expression by tumour and/or immune cells. PD-L1 and CD4 and CD8 TIL expressions were not significantly associated with clinical outcomes                                                                                                                        | Our study suggests that tumour-specific CD4+ T cells may be a key regulator of PD-L1 expression within the Tumour microenvironment.                                                                                                                                                                                                                                                                                          |
| 39 | Moratin et al. 2019 [39]   | Expression levels of PD-L1 were significantly higher in female patients than male patients (9% compared to 7.2%). Mean expression of PD-L1 was 7.9% of cells per section                                                                                                                                           | The expression scores of PD-L1 correlated significantly with the tumour size, the presence and the stadium of neck node metastases, clinical stage, and age. There was a trend                                                                                                                                                                                                                                               |

|    |                                 |                                                                                                                                                                                                                                          |                                                                                                                                                                                                                                                                                                                                                                                                                                  |
|----|---------------------------------|------------------------------------------------------------------------------------------------------------------------------------------------------------------------------------------------------------------------------------------|----------------------------------------------------------------------------------------------------------------------------------------------------------------------------------------------------------------------------------------------------------------------------------------------------------------------------------------------------------------------------------------------------------------------------------|
|    |                                 |                                                                                                                                                                                                                                          | toward worse overall survival for patients with higher PD-L1 expression<br>AntiPD-1/PD-L1 therapy may be of therapeutic use even in early stage OSCC to prevent further disease progression                                                                                                                                                                                                                                      |
| 40 | Moreira et al. 2010 [40]        | A lower percentage of CTLA-4+ cells was observed in OSCC compared with Lip SCC (3.39% vs 13.12%).                                                                                                                                        | Higher CTLA-4 expression was significantly associated with a low tumour proliferative index<br>No association between CTLA-4 expression and survival                                                                                                                                                                                                                                                                             |
| 41 | Muller et al. 2017 [41]         | PD-L1 expression was at the membrane and cytoplasm of tumour cells. A subset of peritumoral and tumour infiltrating lymphocytes also revealed strong immunoreactivity for PD-L1.                                                         | There was no correlation between PD-L1 with tumour stage, lymph node involvement, lymphatic invasion, vascular invasion, tumour grade or extracapsular expansion<br>PD-L1 expression is a suitable prognostic biomarker, independently of other well-known prognostic factors such as tumour stage and tumour grade (hazard ratio: 4.269 and 2.845 for cohort 1 and 2). PD-L1 expression was a strong predictor for poor outcome |
| 42 | Naruse et al. 2019 [42]         | Among 121 OSCC, 54.5% were positive for PD-1 and 57.9% were positive for PD-L1 by IHC.<br>PD-L1 was expressed primarily in the cytoplasm and nuclei of tumour cells, with particularly strong expression observed at the invasive front. | A significant decrease in 5-year disease specific survival rate for patients with combined PD-1+/PD-L1+ expressions.<br>Inhibition of the PD-1/PD-L1 axis may be a good strategy to improve prognosis in OTSCC patients with local recurrence after NAC                                                                                                                                                                          |
| 43 | Ngamphaiboon et al. 2019 [43]   | 79 of 94 OSCC samples (84%) were classed as positive for PD-L1 expression.                                                                                                                                                               | Patient sex, smoking status, site of primary cancer, stage at diagnosis, and p16 status were not associated with PD-L1 expression<br>Highly expressed PD-L1 (≥50%) was an independent prognostic factor for poor overall survival in anti-PD-1/PD-L1 untreated OSCC patients                                                                                                                                                     |
| 44 | Okada et al. 2018 [44]          | PD-L1 expression was negative in 11 cases, weakly positive in 9 cases, and strongly positive in 6 cases.                                                                                                                                 | The 5-year overall survival rates in the low and high PD-L1 groups were 72.5% and 16.7%, respectively.<br>High PD- L1 expression is an independent poor prognostic factor in OSCC patients with surgically resected pulmonary metastasis                                                                                                                                                                                         |
| 45 | Oliveira-Costa et al. 2015 [45] | Cytoplasmic PD-L1 expression in 47/96 cases while membrane expression was in 7/96. PD-L1 cytoplasmic expression was histologically found in areas with undifferentiated cells                                                            | Cytoplasmic PD-L1 expression was significantly associated with tumour size (hazard ratio: 7.618). PD-L1 was expressed                                                                                                                                                                                                                                                                                                            |

|    |                                |                                                                                                                                                                                                                                                                                                                                                 |                                                                                                                                                                                                                  |
|----|--------------------------------|-------------------------------------------------------------------------------------------------------------------------------------------------------------------------------------------------------------------------------------------------------------------------------------------------------------------------------------------------|------------------------------------------------------------------------------------------------------------------------------------------------------------------------------------------------------------------|
|    |                                |                                                                                                                                                                                                                                                                                                                                                 | translationally and at the protein level in OSCC-derived circulating tumour cells.                                                                                                                               |
| 46 | Pekiner et al. 2012 [46]       | CTLA-4 was expressed an average of 1.01 times greater than CD8 in OLP, but an average of 0.74 times lower in controls                                                                                                                                                                                                                           | No significant difference in the percentage of CTLA-4 in OLP and controls (P>0.05)                                                                                                                               |
| 47 | Poropatich et al. 2017 [47]    | PD-1+ CD8+ T-cell levels were positively correlated with increased size of the primary site tumour (r = 0.63). CTLA-4 and PD-1 expression on CD8+ T cells were significantly higher in stage IV HPV-negative than in stage IV HPV-positive patients. Treg TIM3 expression was 51.94% in HPV-negative compared to 14.88% in HPV-positive samples | PD-1 and TIM-3 T-cell expression were specifically elevated in OSCC patients as compared with healthy controls                                                                                                   |
| 48 | Quan et al. 2016 [48]          | Compared with the matched PBMCs in both CD41 and CD81 TIL-Ts we found a significant increase in the expression of PD-1 and Tim-3                                                                                                                                                                                                                | T-cells expressing PD-1 and Tim-3 indicate T cell exhaustion and contribute to an immunosuppressive environment                                                                                                  |
| 49 | Rasmussen et al. 2019 [49]     | Using a 1% cut-off value to define positivity, 36% of the specimens were concordant with tumour proportion score and 52% were concordant with combined positive score. With a 50% cut off, the concordance was higher at 70% with tumour proportion score and 54% with combined positive score.                                                 | The assessed PD-L1 positivity varies markedly within the tumour in this patient series which limits the utility of this biomarker                                                                                |
| 50 | Ryu et al. 2017 [50]           | When comparing immune cell compositions among p16 patterns, both the MOSAIC and STRONG patterns similarly revealed high infiltration of CD3+, CD8+, and PD-1+ T cells. PD-1+ T cells were higher in NUCLEAR than in the ABSENT patterns of staining                                                                                             | The association of the nuclear pattern with worse prognosis may be related to a relatively high proportion of exhausted and dysfunctional PD-1+ T cells, although with fewer infiltrating CD8+ cytotoxic T cells |
| 51 | Saâda-Bouزيد et al. 2017 [51]  | Not Specified                                                                                                                                                                                                                                                                                                                                   | 29% of patients with OSCC experienced hyperprogression as defined by a tumour growth kinetics ratio exceeding two during anti-PD-1/PD-L1 therapy                                                                 |
| 52 | Sablin et al. 2016 [52]        | 27 samples showed PD-L1 overexpression and 69 samples showed no PD-L1 overexpression                                                                                                                                                                                                                                                            | Identification of druggable overexpressed genes PGF, PDL1, CDK6, EGFR, MET, VEGFA were associated with a poor outcome.                                                                                           |
| 53 | Satgunaseelan et al. 2017 [53] | PD-L1 expression in more than 5% of the SCC cells was present in 40 cases. Cell membrane and cytoplasmic staining were observed in this cohort and there was no nuclear staining. Weak 1+ staining intensity was observed in 26, moderate 2+ staining                                                                                           | PD-L1 expression was observed in 18% of the cases in the current cohort                                                                                                                                          |

|    |                               |                                                                                                                                                                                                                                           |                                                                                                                                                                                                                                                                                                                                                                       |
|----|-------------------------------|-------------------------------------------------------------------------------------------------------------------------------------------------------------------------------------------------------------------------------------------|-----------------------------------------------------------------------------------------------------------------------------------------------------------------------------------------------------------------------------------------------------------------------------------------------------------------------------------------------------------------------|
|    |                               | intensity was present in 7 and strong 3+ staining intensity was seen in 7 cases                                                                                                                                                           |                                                                                                                                                                                                                                                                                                                                                                       |
| 54 | Scognamiglio et al. 2017 [54] | Fifty-eight of 96 cases (60%) showed PD-L1 expression in the immunocytes in the tumour microenvironments, whereas 38 (40%) of the cases were negative for PD-L1                                                                           | Frequent discordance of PD-L1 expression between primary and metastatic tumours would indicate that the tissue typing for PD-L1 expression should ideally be performed on the metastatic tumour if PD-L1 positivity is included as an eligibility criterion in anti-PD-1/PD-L1 clinical trials                                                                        |
| 55 | Seiwert et al. 2016 [55]      | 81 out of 104 (84%) screened patients were positive for PD-L1 at the 1% cut-off level                                                                                                                                                     | PD-L1 expression by IHC was predictive of best overall response and improved progression-free survival. Greater anti-tumour activity was recorded in OSCC that expressed higher levels of PD-L1                                                                                                                                                                       |
| 56 | Shayan et al. 2017 [56]       | Expression of macrophage PD-L1 was increased by approximately one-fold change when incubated with cetuximab plus motolimod                                                                                                                | Addition of a PD-1 inhibitor to the combination of cetuximab and motolimod would further augment the antitumor response. Otolimod plus cetuximab decreased induction of Treg and reduced markers of suppression, including CTLA-4                                                                                                                                     |
| 57 | Singh et al. 2017 [57]        | PD-L1 was significantly up-regulated from 1 to 2 fold changes in most of the tumours but downregulated in two tumours                                                                                                                     | Expression of PD-L1 was upregulated in 10 of the 12 studied tumours suggesting these subsets of tumours may be susceptible for checkpoint blockade therapy                                                                                                                                                                                                            |
| 58 | Sridharan et al. 2016 [58]    | All checkpoint receptor bearing cell populations increased following treatment. Low levels of soluble PD-L1 in all patients was found                                                                                                     | Radiation-induced effects on the local tumour microenvironment in OSCC patients may translate into quantifiable immune effects in circulating immune mediators, T cell receptor repertoires, and potential anti-tumour antibody responses. Higher baseline levels of soluble PD-L1 correlated with nodal status, higher levels in patients with node-positive disease |
| 59 | Strati et al. 2017 [59]       | Median fold change of PD-L1 expression in the EpCAM- PBMC fraction was 1.03 in controls and 0.39 in OSCC samples , and in the EpCAM+ PBMC fraction was 1.28 in controls and 2.70 in OSCC samples                                          | PD-L1 expression in the EpCAM+ CTC fraction may evolve during treatment and this modulation may inform clinical trial design of the sequence of chemotherapy and/or radiation with immunotherapy                                                                                                                                                                      |
| 60 | Straub et al. 2016 [60]       | PD-L1 expression in at least 5% of tumour cells was found in 36/80 of OSCCs. 41/79 cases contained PD-1 positive TILs. In the SCC cohort with PD-L1 immuno-positive tumours, the risk of tumour related death was significantly increased | PD-L1 gene is amplified in OSCC and is accompanied by immunohistochemical PD-L1 protein over-expression. PD-L1 positive cases have a significantly higher risk for nodal                                                                                                                                                                                              |

|    |                             |                                                                                                                                                                                                                                                                                                                                                              |                                                                                                                                                                                                                                         |
|----|-----------------------------|--------------------------------------------------------------------------------------------------------------------------------------------------------------------------------------------------------------------------------------------------------------------------------------------------------------------------------------------------------------|-----------------------------------------------------------------------------------------------------------------------------------------------------------------------------------------------------------------------------------------|
|    |                             |                                                                                                                                                                                                                                                                                                                                                              | metastasis at diagnosis and is associated with higher risk for overall tumour-related death and recurrence                                                                                                                              |
| 61 | Strauss et al. 2017 [61]    | CD25 high cells had significantly increased expression of CTLA-4 compared to CD25 low cells (mean fluorescence intensity of 120 vs 15). Rapamycin enhanced CTLA-4 expression on CD35 high clones with mean fluorescence intensity increasing from 120 pre-treatment to 235 post treatment                                                                    | CD62L, CTLA-4 and Foxp3 are the key molecules associated with high levels of suppression mediated by human Tregs                                                                                                                        |
| 62 | Takahashi et al. 2019 [62]  | 31 patients had OSCC with low PD-L1 expression, and 46 had high PD-L1 expression                                                                                                                                                                                                                                                                             | There was no significant relationship between any form of T-cell infiltration and PD-L1 expression in tumour cells                                                                                                                      |
| 63 | Takakura et al. 2017 [63]   | PD-L1 expression analysis in cancer nest specimens showed in the nNAC group, 8/10 specimens showed intermediate-to-strong expression of PD-L1 protein whereas 6/8 NAC group specimens showed weak expression                                                                                                                                                 | no association was found between the groups of NAC and nNAC patients and the disease-free survival                                                                                                                                      |
| 64 | Troeltzsch et al. 2017 [64] | Marked PD-L1 expression was observed in 26/88 (29%) OSCC specimens and 73/88 (83%) showed considerable presence of PD-1-positive TILs. Relevant PD-L1 expression was noted significantly more often in cancers from mandibular and oral tongue than maxilla or soft palate. OSCC specimens with high PD-L1 expression displayed infiltration with PD-1+ TILs | PD-L1 expression in OSCC was associated with an increased metastasis and greater levels of infiltrating PD-1+ TILs. PD-L1 expression in OSCC might differ depending on its anatomic origin                                              |
| 65 | Wang et al. 2019 [65]       | Nimotuzumab therapy significantly increased the expression of TIM-3, LAG-3, IDO, PD-L1, and CTLA-4 in the tumour microenvironment of OSCC patients compared with baseline                                                                                                                                                                                    | Aberrant expressed LAG-3 and PD-L1 were more likely to be associated with a worse survival (hazard ratio = 1.504) and could be considered as indicators of poor prognosis in OSCC                                                       |
| 66 | Weber et al. 2018 [66]      | PD-L1_4 and PD-L1_2 showed significantly increased expression, up to 3-fold, in OSCC compared to normal oral mucosa                                                                                                                                                                                                                                          | PD-L1 expression in peripheral blood might be an indicator of the existence of metastatic disease via nodal involvement in OSCC. There is also an association between a systemic state of immune tolerance and a more aggressive tumour |
| 67 | Wirsing et al. 2018 [67]    | PD-L1 expression in OSCC cells correlates with increased infiltration of CD4+ cells and small tumour size                                                                                                                                                                                                                                                    | PD-L1-expressing tumour cells correlated positively to a tumour microenvironment rich in CD4+ cells but had no prognostic significance. PD-1/PD-L1-targeted immunotherapy might be successful in tumours rich in CD4+ cells             |
| 68 | Wong et al. 2006 [68]       | No significant difference between samples and controls for all CTLA-4 phenotypes (Phenotype A frequency: 59.9% in OSCC vs                                                                                                                                                                                                                                    | CTLA-4 A/A genotype polymorphism is associated with younger age of onset and poorer survival in OSCC patients                                                                                                                           |

|    |                                           |                                                                                                                                                                                                                                                                                                                                                                                                                                                          |                                                                                                                                                                                                                                                                                            |
|----|-------------------------------------------|----------------------------------------------------------------------------------------------------------------------------------------------------------------------------------------------------------------------------------------------------------------------------------------------------------------------------------------------------------------------------------------------------------------------------------------------------------|--------------------------------------------------------------------------------------------------------------------------------------------------------------------------------------------------------------------------------------------------------------------------------------------|
|    |                                           | 60.5% in controls, and phenotype G frequency: 89.9% in OSCC vs 83.0% in controls)                                                                                                                                                                                                                                                                                                                                                                        |                                                                                                                                                                                                                                                                                            |
| 69 | Wu et al. 2017 [69]                       | IHC staining showed that CTLA-4 was highly expressed on the TILs in the tumour microenvironment. PD-L1 and CTLA-4 were overexpressed in OSCC and VISTA was positively correlated with PD-L1 ( $r=0.342$ ) and CTLA-4 (0.294)                                                                                                                                                                                                                             | VISTA is overexpressed in OSCC and is correlated with PD-L1 and CTLA-4 indicating that it may regulate antitumor immunity                                                                                                                                                                  |
| 70 | Wu et al. 2019 [70]                       | PD-1 was co-expressed with TIGIT on human CD4+ and CD8+ T cells and TILs, and that this co-expression was higher on TILs than PBMCs (62.61% total cells vs 9.22% total cells)                                                                                                                                                                                                                                                                            | The data indicated that blocking PD-1 and TIGIT corporately may elicit better antitumor effects                                                                                                                                                                                            |
| 71 | Xu et al. 2019 [71]                       | PD-L1 immunopositivity was more frequent in the salivary duct carcinoma ex-pleiomorphic adenoma group than in the salivary duct carcinoma de-novo group. PD-1 expression in immune cells was seen in 35 salivary duct carcinomas. PD-L1 and PD-1 expression did not predict the risk of lymph node metastases                                                                                                                                            | Expression of tumour-specific antigens and over-expression of PD-1 and PD-L1 indicate that salivary duct carcinoma patients may benefit from novel immune therapy approaches                                                                                                               |
| 72 | Yagyuu et al. 2017 [72]                   | Oral pre-cancerous lesion patients with subepithelial PD-L1+ cell count below median showed a 5-year malignant-free survival rate of 96.8%, whereas the survival rate for those with above median counts showed a decreased survival rate of 86.1%. For every additional increase in the number of subepithelial PD-L1+ cells and PD-L1 positivity score of epithelium, the risk of malignant transformation increased 1.07 and 3.38 times, respectively | Subepithelial PD-L1-positive cell count and epithelial PD-L1 positivity were significantly associated with malignant transformation, whereas low subepithelial PD-L1 expression was associated with greater 5-year malignant free survival                                                 |
| 73 | Yang et al. 2019 [73]                     | Plasmacytoid dendritic cell infiltration was positively correlated with PD-1 ( $r = 0.3628$ ), LAG3 ( $r = 0.3241$ ), and TIM3 ( $r = 0.4834$ ) staining                                                                                                                                                                                                                                                                                                 | Plasmacytoid dendritic cell high infiltration correlated with an adverse outcome in human primary OSCC patients                                                                                                                                                                            |
| 74 | Yoo et al. 2019 [74]                      | PD-L1 expression was positive in 65.2% and negative in 34.8% of samples                                                                                                                                                                                                                                                                                                                                                                                  | Loss of MHC class I expression is significantly associated with a worse prognosis in PD-L1-positive OSCC (hazard ratio = 4.24) but had no significance in the PD-L1 negative group. The combination of MHC class I and PD-L1 might be useful to predict the clinical course of the disease |
| 75 | Youngnak-Piboonratanakit et al. 2004 [75] | PD-1 was expressed abundantly on sub-epithelial infiltrating cells (38% cells/mm <sup>2</sup> ) in all OLP cases. PD-L1 was also moderately expressed in sub-epithelial infiltrates (25% cells/mm <sup>2</sup> ) in all OLP cases                                                                                                                                                                                                                        | PD-1 and its ligands are expressed on infiltrating lymphocytes in OLP lesions                                                                                                                                                                                                              |



76

Zhou et al.  
2012 [76]

Expression of PD-1 and PD-L1 on T cells in OLP patients was significantly higher than controls (PD-1: 16.16% vs 10.15%. PD-L1: 22.73% vs 12.41%). Serum sPD-1 concentration had no difference between patients with OLP and healthy subjects

The PD-1/PD-L1 pathway may play an important role in negatively regulating T cell-mediated immune response in OLP. PD-L1 levels on peripheral blood T cells may be a marker in monitoring the disease severity of OLP. Agonists targeting this pathway could be a therapeutic strategy for OLP

Abbreviations: oral cavity squamous cell carcinoma (OSCC), oral lichen planus (OLP), immunohistochemistry (IHC), oral leukoplakia (OLK), tumour infiltrating lymphocyte (TIL), peripheral blood mononuclear cell (PBMC), neoadjuvant chemotherapy (NAC), non-neoadjuvant chemotherapy (nNAC), V-domain Ig suppressor of T cell activation (VISTA), T-cell immunoglobulin and ITIM domain (TIGIT).

## References

1. Aggarwal, S.; Sharma, S.C.; Das, S.N. Dynamics of regulatory T cells (Tregs ) in patients with oral squamous cell carcinoma. *J. Surg. Oncol.* **2017**, *116*, 1103–1113
2. Ahn, H.; Yang, J.M.; Kim, H.; Chung, J.H.; Ahn, S.H.; Jeong, W.J.; Paik, J.H. Clinicopathologic implications of the miR-197/PD-L1 axis in oral squamous cell carcinoma. *Oncotarget* **2017**, *8*, 66178–66194.
3. Balermpas, P.; Rodel, F.; Krause, M.; Linge, A.; Lohaus, F.; Baumann, M.; Tinhofer, I.; Budach, V.; Sak, A.; Stuschke, M.; et al. The PD-1/PD-L1 axis and human papilloma virus in patients with head and neck cancer after adjuvant chemoradiotherapy: A multicentre study of the German Cancer Consortium Radiation Oncology Group (DKTK-ROG). *Int. J. Cancer* **2017**, *141*, 594–603.
4. Bauml, J.; Seiwert, T.Y.; Pfister, D.G.; Worden, F.; Liu, S.V.; Gilbert, J.; Saba, N.F.; Weiss, J.; Wirth, L.; Sukari, A.; et al. Pembrolizumab for Platinum- and Cetuximab-Refractory Head and Neck Cancer: Results From a Single-Arm, Phase II Study. *J. Clin. Oncol.* **2017**, *35*, 1542–1549.
5. Bharti, V.; Mohanti, B.K.; Das, S.N. Functional genetic variants of CTLA-4 and risk of tobacco-related oral carcinoma in high-risk North Indian population. *Hum. Immunol.* **2013**, *74*, 348–352.
6. Bhosale, P.G.; Cristea, S.; Ambatipudi, S.; Desai, R.S.; Kumar, R.; Patil, A.; Kane, S.; Borges, A.M.; Schaffer, A.A.; Beerenwinkel, N.; et al. Chromosomal Alterations and Gene Expression Changes Associated with the Progression of Leukoplakia to Advanced Gingivobuccal Cancer. *Transl. Oncol.* **2017**, *10*, 396–409.
7. Cai, Y.; Wang, F.; Liu, Q.; Li, Z.; Li, D.; Sun, Z. A novel humanized anti-PD-1 monoclonal antibody potentiates therapy in oral squamous cell carcinoma. *Investig. New Drugs* **2019**, *37*, 799–809.
8. Chen, T.C.; Wu, C.T.; Wang, C.P.; Hsu, W.L.; Yang, T.L.; Lou, P.J.; Ko, J.Y.; Chang, Y.L. Associations among pretreatment tumor necrosis and the expression of HIF-1 $\alpha$  and PD-L1 in advanced oral squamous cell carcinoma and the prognostic impact thereof. *Oral Oncol.* **2015**, *51*, 1004–1010.
9. Chen, S.-C.; Chang, P.M.-H.; Wang, H.-J.; Tai, S.-K.; Chu, P.-Y.; Yang, M.-H. PD-L1 expression is associated with p16(INK4A) expression in non-oropharyngeal head and neck squamous cell carcinoma. *Oncol. Lett.* **2018**, *15*, 2259–2265.
10. Chen, X.J.; Tan, Y.Q.; Zhang, N.; He, M.J.; Zhou, G. Expression of programmed cell death-ligand 1 in oral squamous cell carcinoma and oral leukoplakia is associated with disease progress and CD8+ tumor-infiltrating lymphocytes. *Pathol. Res. Pract.* **2019**, *215*, 152418.
11. Cho, Y.A.; Yoon, H.J.; Lee, J.I.; Hong, S.P.; Hong, S.D. Relationship between the expressions of PD-L1 and tumor-infiltrating lymphocytes in oral squamous cell carcinoma. *Oral Oncol.* **2011**, *47*, 1148–1153.
12. Dong, J.; Cheng, L.; Zhao, M.; Pan, X.; Feng, Z.; Wang, D. Tim-3-expressing macrophages are functionally suppressed and expanded in oral squamous cell carcinoma due to virus-induced Gal-9 expression. *Tumour Biol.* **2017**, *39*, 1010428317701651.

13. Du, G.H.; Qin, X.P.; Li, Q.; Zhou, Y.M.; Shen, X.M.; Tang, G.Y. The high expression level of programmed death-1 ligand 2 in oral lichen planus and the possible costimulatory effect on human T cells. *J. Oral Pathol. Med.* **2011**, *40*, 525–532.
14. Falco, A.; Angel, M.; Perez, J.F.; Cayol, F.; Pucella, I.; Gomez Abuin, G.; Florez, J.; Adelchanow, E.; Palazzo, J.; Palazzo, F.; et al. Immunotherapy in Advanced Head and Neck Squamous Cell Carcinoma: A Retrospective Evaluation in Latin America. *Biomed. J. Sci. Tech. Res.* **2019**, *17*, 12708–12712.
15. Fayette, J.; Guigay, J.; Le Tourneau, C.; Degardin, M.; Peyrade, F.; Neidhardt, E.M.; Sablin, M.P.; Even, C.; Orlandini, F.; Juzyna, B.; et al. Cabazitaxel in recurrent/metastatic squamous cell carcinoma of the head and neck: Phase II UNICANCER trial ORL03. *Oncotarget* **2017**, *8*, 51830–51839.
16. Feldman, R.; Gatalica, Z.; Knezetic, J.; Reddy, S.; Nathan, C.A.; Javadi, N.; Teknos, T. Molecular profiling of head and neck squamous cell carcinoma. *Head Neck* **2016**, *38* (Suppl. 1), E1625–E1638.
17. Ferris, R.L.; Blumenschein, G., Jr.; Fayette, J.; Guigay, J.; Colevas, A.D.; Licitra, L.; Harrington, K.; Kasper, S.; Vokes, E.E.; Even, C.; et al. Nivolumab for Recurrent Squamous-Cell Carcinoma of the Head and Neck. *N. Engl. J. Med.* **2016**, *375*, 1856–1867.
18. Fiedler, M.; Weber, F.; Hautmann, M.G.; Haubner, F.; Reichert, T.E.; Klingelhoffer, C.; Schreml, S.; Meier, J.K.; Hartmann, A.; Ettl, T. Biological predictors of radiosensitivity in head and neck squamous cell carcinoma. *Clin. Oral Investig.* **2017**, *22*, 189–200.
19. Foy, J.P.; Bertolus, C.; Michallet, M.C.; Deneuve, S.; Incitti, R.; Bendriss-Vermare, N.; Albaret, M.A.; Ortiz-Cuaran, S.; Thomas, E.; Colombe, A.; et al. The immune microenvironment of HPV-negative oral squamous cell carcinoma from never-smokers and never-drinkers patients suggests higher clinical benefit of IDO1 and PD1/PD-L1 blockade. *Ann. Oncol.* **2017**, *28*, 1934–1941.
20. Gasparoto, T.H.; de Souza Malaspina, T.S.; Benevides, L.; de Melo, E.J., Jr.; Costa, M.R.; Damante, J.H.; Ikoma, M.R.; Garlet, G.P.; Cavassani, K.A.; da Silva, J.S.; et al. Patients with oral squamous cell carcinoma are characterized by increased frequency of suppressive regulatory T cells in the blood and tumor microenvironment. *Cancer Immunol. Immunother.* **2010**, *59*, 819–828.
21. Ghapanchi, J.; Ghaderi, H.; Haghshenas, M.R.; Jamshidi, S.; Rezazadeh, F.; Azad, A.; Farzin, M.; Derafshi, R.; Kalantari, A.H. Observational Molecular Case-Control Study of Genetic Polymorphisms 1 in Programmed Cell Death Protein-1 in Patients with Oral Lichen Planus. *Asian Pac. J. Cancer Prev.* **2019**, *20*, 421–424.
22. Goltz, D.; Gevensleben, H.; Dietrich, J.; Schroeck, F.; de Vos, L.; Droege, F.; Kristiansen, G.; Schroeck, A.; Landsberg, J.; Bootz, F.; et al. PDCD1 (PD-1) promoter methylation predicts outcome in head and neck squamous cell carcinoma patients. *Oncotarget* **2017**, *8*, 41011–41020.
23. Groeger, S.; Howaldt, H.P.; Raifer, H.; Gattenloehner, S.; Chakraborty, T.; Meyle, J. Oral Squamous Carcinoma Cells Express B7-H1 and B7-DC Receptors in Vivo. *Pathol. Oncol. Res.* **2017**, *23*, 99–110.
24. Hanna, G.J.; Woo, S.B.; Li, Y.Y.; Barletta, J.A.; Hammerman, P.S.; Lorch, J.H. Tumor PD-L1 expression is associated with improved survival and lower recurrence risk in young women with oral cavity squamous cell carcinoma. *Int. J. Oral Maxillofac. Surg.* **2017**, *47*, 568–577.
25. Hanna, G.J.; Liu, H.; Jones, R.E.; Bacay, A.F.; Lizotte, P.H.; Ivanova, E.V.; Bittinger, M.A.; Cavanaugh, M.E.; Rode, A.J.; Schoenfeld, J.D.; et al. Defining an inflamed tumor immunophenotype in recurrent, metastatic squamous cell carcinoma of the head and neck. *Oral Oncol.* **2017**, *67*, 61–69.
26. Jie, H.B.; Gildener-Leapman, N.; Li, J.; Srivastava, R.M.; Gibson, S.P.; Whiteside, T.L.; Ferris, R.L. Intratumoral regulatory T cells upregulate immunosuppressive molecules in head and neck cancer patients. *Br. J. Cancer* **2013**, *109*, 2629–2635.
27. Kammerer, P.W.; Toyoshima, T.; Schoder, F.; Kammerer, P.; Kuhr, K.; Brieger, J.; Al-Nawas, B. Association of T-cell regulatory gene polymorphisms with oral squamous cell carcinoma. *Oral Oncol.* **2010**, *46*, 543–548.
28. Katou, F.; Ohtani, H.; Watanabe, Y.; Nakayama, T.; Yoshie, O.; Hashimoto, K. Differing phenotypes between intraepithelial and stromal lymphocytes in early-stage tongue cancer. *Cancer Res.* **2007**, *67*, 11195–11201.

29. Larkins, E.; Blumenthal, G.M.; Yuan, W.; He, K.; Sridhara, R.; Subramaniam, S.; Zhao, H.; Liu, C.; Yu, J.; Goldberg, K.B.; et al. FDA Approval Summary: Pembrolizumab for the Treatment of Recurrent or Metastatic Head and Neck Squamous Cell Carcinoma with Disease Progression on or After Platinum-Containing Chemotherapy. *Oncologist* **2017**, *22*, 873–878.
30. Lecerf, C.; Kamal, M.; Vacher, S.; Chemlali, W.; Schnitzler, A.; Morel, C.; Dubot, C.; Jeannot, E.; Meseure, D.; Kljanienco, J.; et al. Immune gene expression in head and neck squamous cell carcinoma patients. *Eur. J. Cancer* **2019**, *121*, 210–223.
31. Lechner, A.; Schlosser, H.; Rothschild, S.I.; Thelen, M.; Reuter, S.; Zentis, P.; Shimabukuro-Vornhagen, A.; Theurich, S.; Wennhold, K.; Garcia-Marquez, M.; et al. Characterization of tumor-associated T-lymphocyte subsets and immune checkpoint molecules in head and neck squamous cell carcinoma. *Oncotarget* **2017**, *8*, 44418–44433.
32. Leduc, C.; Adam, J.; Louvet, E.; Sourisseau, T.; Dorvault, N.; Bernard, M.; Maingot, E.; Faivre, L.; Cassin-Kuo, M.-S.; Boissier, E.; et al. TPF induction chemotherapy increases PD-L1 expression in tumour cells and immune cells in head and neck squamous cell carcinoma. *ESMO Open* **2018**, *3*, e000257.
33. Lin, Y.M.; Sung, W.W.; Hsieh, M.J.; Tsai, S.C.; Lai, H.W.; Yang, S.M.; Shen, K.H.; Chen, M.K.; Lee, H.; Yeh, K.T. et al.: High PD-L1 Expression Correlates with Metastasis and Poor Prognosis in Oral Squamous Cell Carcinoma. *PLoS ONE* **2015**, *10*, e0142656.
34. Linedale, R.; Schmidt, C.; King, B.T.; Ganko, A.G.; Simpson, F.; Panizza, B.J.; Leggatt, G.R. Elevated frequencies of CD8 T cells expressing PD-1, CTLA-4 and Tim-3 within tumour from perineural squamous cell carcinoma patients. *PLoS ONE* **2017**, *12*, e0175755.
35. Malaspina, T.S.; Gasparoto, T.H.; Costa, M.R.; de Melo, E.F., Jr.; Ikoma, M.R.; Damante, J.H.; Cavassani, K.A.; Garlet, G.P.; da Silva, J.S.; Campanelli, A.P. Enhanced programmed death 1 (PD-1) and PD-1 ligand (PD-L1) expression in patients with actinic cheilitis and oral squamous cell carcinoma. *Cancer Immunol. Immunother.* **2011**, *60*, 965–974.
36. Malm, I.J.; Bruno, T.C.; Fu, J.; Zeng, Q.; Taube, J.M.; Westra, W.; Pardoll, D.; Drake, C.G.; Kim, Y.J. Expression profile and in vitro blockade of programmed death-1 in human papillomavirus-negative head and neck squamous cell carcinoma. *Head Neck* **2015**, *37*, 1088–1095.
37. Maruse, Y.; Kawano, S.; Jinno, T.; Matsubara, R.; Goto, Y.; Kaneko, N.; Sakamoto, T.; Hashiguchi, Y.; Moriyama, M.; Toyoshima, T.; et al. Significant association of increased PD-L1 and PD-1 expression with nodal metastasis and a poor prognosis in oral squamous cell carcinoma. *Int. J. Oral Maxillofac. Surg.* **2018**, *47*, 836–845.
38. Mattox, A.; Lee, J.; Westra, W.H.; Pierce, R.H.; Ghossein, R.; Faquin, W.C.; Diefenbach, T.J.; Morris, L.G.; Lin, D.T.; Wirth, L.J.; et al. PD-1 expression in head and neck squamous cell carcinomas derives primarily from functionally anergic CD4+ TILs in the presence of PD-L1+ TAMs. *Cancer Res.* **2017**, *77*, 6365–6374.
39. Moratin, J.; Metzger, K.; Safaltin, A.; Herpel, E.; Hoffmann, J.; Freier, K.; Hess, J.; Horn, D. Upregulation of PD-L1 and PD-L2 in neck node metastases of head and neck squamous cell carcinoma. *Head Neck* **2019**, *41*, 2484–2491.
40. Moreira, G.; Fulgencio, L.B.; Ef, D.E.M.; Leles, C.R.; Batista, A.C.; Ta, D.A.S. T regulatory cell markers in oral squamous cell carcinoma: Relationship with survival and tumor aggressiveness. *Oncol. Lett.* **2010**, *1*, 127–132.
41. Muller, T.; Braun, M.; Dietrich, D.; Aktekin, S.; Hoft, S.; Kristiansen, G.; Goke, F.; Schrock, A.; Bragelmann, J.; Held, S.A.E.; et al. PD-L1: A novel prognostic biomarker in head and neck squamous cell carcinoma. *Oncotarget* **2017**, *8*, 52889–52900.
42. Naruse, T.; Yanamoto, S.; Okuyama, K.; Ohmori, K.; Tsuchihashi, H.; Furukawa, K.; Yamada, S.I.; Umeda, M. Immunohistochemical Study of PD-1/PD-L1 Axis Expression in Oral Tongue Squamous Cell Carcinomas: Effect of Neoadjuvant Chemotherapy on Local Recurrence. *Pathol. Oncol. Res.* **2019**, *26*, 735–742.
43. Ngamphaiboon, N.; Chureemas, T.; Siripoon, T.; Arsa, L.; Trachu, N.; Jiarpinitnun, C.; Pattaranutaporn, P.; Sirachainan, E.; Larbcharoensub, N. Characteristics and impact of programmed death-ligand 1 expression, CD8+ tumor-infiltrating lymphocytes, and p16 status in head and neck squamous cell carcinoma. *Med. Oncol.* **2019**, *36*, 21.
44. Okada, S.; Itoh, K.; Ishihara, S.; Shimada, J.; Kato, D.; Tsunozuka, H.; Miyata, N.; Hirano, S.; Teramukai, S.; Inoue, M. Significance of PD-L1 expression in pulmonary metastases from head and neck squamous cell carcinoma. *Surg. Oncol.* **2018**, *27*, 259–265.

45. Oliveira-Costa, J.P.; de Carvalho, A.F.; da Silveira da, G.G.; Amaya, P.; Wu, Y.; Park, K.J.; Gigliola, M.P.; Lustberg, M.; Buim, M.E.; Ferreira EN et al.: Gene expression patterns through oral squamous cell carcinoma development: PD-L1 expression in primary tumor and circulating tumor cells. *Oncotarget* **2015**, *6*, 20902–20920.
46. Pekiner, F.N.; Demirel, G.Y.; Borahan, M.O.; Ozbayrak, S. Evaluation of cytotoxic T-cell activation, chemokine receptors, and adhesion molecules in blood and serum in patients with oral lichen planus. *J. Oral Pathol. Med.* **2012**, *41*, 484–489.
47. Poropatich, K.; Fontanarosa, J.; Swaminathan, S.; Dittmann, D.; Chen, S.; Samant, S.; Zhang, B. Comprehensive T-cell immunophenotyping and next-generation sequencing of human papillomavirus (HPV)-positive and HPV-negative head and neck squamous cell carcinomas. *J. Pathol.* **2017**, *243*, 354–365.
48. Quan, H.; Fang, L.; Pan, H.; Deng, Z.; Gao, S.; Liu, O.; Wang, Y.; Hu, Y.; Fang, X.; Yao, Z.; et al. An adaptive immune response driven by mature, antigen-experienced T and B cells within the microenvironment of oral squamous cell carcinoma. *Int. J. Cancer* **2016**, *138*, 2952–2962.
49. Rasmussen, J.H.; Lelkaitis, G.; Hakansson, K.; Vogelius, I.R.; Johannesen, H.H.; Fischer, B.M.; Bentzen, S.M.; Specht, L.; Kristensen, C.A.; von Buchwald, C.; et al. Intratumor heterogeneity of PD-L1 expression in head and neck squamous cell carcinoma. *Br. J. Cancer* **2019**, *120*, 1003–1006.
50. Ryu, H.J.; Kim, E.K.; Heo, S.J.; Cho, B.C.; Kim, H.R.; Yoon, S.O. Architectural patterns of p16 immunohistochemical expression associated with cancer immunity and prognosis of head and neck squamous cell carcinoma. *Acta Pathol. Microbiol. Et Immunol. Scand.* **2017**, *125*, 974–984.
51. Saada-Bouzid, E.; Defaucheux, C.; Karabajakian, A.; Coloma, V.P.; Servois, V.; Paoletti, X.; Even, C.; Fayette, J.; Guigay, J.; Loirat, D.; et al. Hyperprogression during anti-PD-1/PD-L1 therapy in patients with recurrent and/or metastatic head and neck squamous cell carcinoma. *Ann. Oncol.* **2017**, *28*, 1605–1611.
52. Sablin, M.P.; Dubot, C.; Klijanienko, J.; Vacher, S.; Ouafi, L.; Chemlali, W.; Caly, M.; Sastre-Garau, X.; Lappartient, E.; Mariani, O.; et al. Identification of new candidate therapeutic target genes in head and neck squamous cell carcinomas. *Oncotarget* **2016**, *7*, 47418–47430.
53. Satgunaseelan, L.; Gupta, R.; Madore, J.; Chia, N.; Lum, T.; Palme, C.E.; Boyer, M.; Scolyer, R.A.; Clark, J.R. Programmed cell death-ligand 1 expression in oral squamous cell carcinoma is associated with an inflammatory phenotype. *Pathology* **2016**, *48*, 574–580.
54. Scognamiglio, T.; Chen, Y.T. Beyond the Percentages of PD-L1-Positive Tumor Cells: Induced Versus Constitutive PD-L1 Expression in Primary and Metastatic Head and Neck Squamous Cell Carcinoma. *Head Neck Pathol.* **2017**, *12*, 221–229.
55. Seiwert, T.Y.; Burtneß, B.; Mehra, R.; Weiss, J.; Berger, R.; Eder, J.P.; Heath, K.; McClanahan, T.; Luceford, J.; Gause, C.; et al. Safety and clinical activity of pembrolizumab for treatment of recurrent or metastatic squamous cell carcinoma of the head and neck (KEYNOTE-012): An open-label, multicentre, phase 1b trial. *Lancet Oncol.* **2016**, *17*, 956–965.
56. Shayan, G.; Kansy, B.A.; Gibson, S.P.; Srivastava, R.M.; Bryan, J.K.; Bauman, J.E.; Ohr, J.; Kim, S.; Duvvuri, U.; Clump, D.A.; et al. Phase Ib Study of Immune Biomarker Modulation with Neoadjuvant Cetuximab and TLR8 Stimulation in Head and Neck Cancer to Overcome Suppressive Myeloid Signals. *Clin. Cancer Res.* **2018**, *24*, 62–72.
57. Singh, R.; De Sarkar, N.; Sarkar, S.; Roy, R.; Chattopadhyay, E.; Ray, A.; Biswas, N.K.; Maitra, A.; Roy, B. Analysis of the whole transcriptome from gingivo-buccal squamous cell carcinoma reveals deregulated immune landscape and suggests targets for immunotherapy. *PLoS ONE* **2017**, *12*, e0183606.
58. Sridharan, V.; Margalit, D.N.; Lynch, S.A.; Severgnini, M.; Zhou, J.; Chau, N.G.; Rabinowits, G.; Lorch, J.H.; Hammerman, P.S.; Hodi, F.S.; et al. Definitive chemoradiation alters the immunologic landscape and immune checkpoints in head and neck cancer. *Br. J. Cancer* **2016**, *115*, 252–260.
59. Strati, A.; Koutsodontis, G.; Papaxoinis, G.; Angelidis, I.; Zavridou, M.; Economopoulou, P.; Kotsantis, I.; Avgeris, M.; Mazel, M.; Perisanidis, C.; et al. Prognostic significance of PD-L1 expression on circulating tumor cells in patients with head and neck squamous cell carcinoma. *Ann. Oncol.* **2017**, *28*, 1923–1933.
60. Straub, M.; Drecoll, E.; Pfarr, N.; Weichert, W.; Langer, R.; Hapfelmeier, A.; Gotz, C.; Wolff, K.D.; Kolk, A.; Specht, K. CD274/PD-L1 gene amplification and PD-L1 protein expression are common events in squamous cell carcinoma of the oral cavity. *Oncotarget* **2016**, *7*, 12024–12034.
61. Strauss, L.; Bergmann, C.; Whiteside, T.L. Functional and phenotypic characteristics of CD4+CD25highFoxp3+ Treg clones obtained from peripheral blood of patients with cancer. *Int. J. Cancer* **2007**, *121*, 2473–2483.

62. Takahashi, H.; Sakakura, K.; Arisaka, Y.; Tokue, A.; Kaira, K.; Tada, H.; Higuchi, T.; Okamoto, A.; Tsushima, Y.; Chikamatsu, K. Clinical and Biological Significance of PD-L1 Expression Within the Tumor Microenvironment of Oral Squamous Cell Carcinoma. *Anticancer Res.* **2019**, *39*, 3039–3046.
63. Takakura, H.; Domae, S.; Ono, T.; Sasaki, A. The Immunological Impact of Chemotherapy on the Tumor Microenvironment of Oral Squamous Cell Carcinoma. *Acta Med. Okayama* **2017**, *71*, 219–226.
64. Troeltzsch, M.; Woodlock, T.; Pianka, A.; Otto, S.; Troeltzsch, M.; Ehrenfeld, M.; Knosel, T. Is There Evidence for the Presence and Relevance of the PD-1/PD-L1 Pathway in Oral Squamous Cell Carcinoma? Hints From an Immunohistochemical Study. *J. Oral Maxillofac. Surg.* **2017**, *75*, 969–977.
65. Wang, H.; Mao, L.; Zhang, T.; Zhang, L.; Wu, Y.; Guo, W.; Hu, J.; Ju, H.; Ren, G. Altered expression of TIM-3, LAG-3, IDO, PD-L1, and CTLA-4 during nimotuzumab therapy correlates with responses and prognosis of oral squamous cell carcinoma patients. *J. Oral Pathol. Med.* **2019**, *48*, 669–676.
66. Weber, M.; Wehrhan, F.; Baran, C.; Agaimy, A.; Büttner-Herold, M.; Preidl, R.; Neukam, F.W.; Ries, J. PD-L1 expression in tumor tissue and peripheral blood of patients with oral squamous cell carcinoma. *Oncotarget* **2017**, *8*, 112584–112597.
67. Wirsing, A.M.; Ervik, I.K.; Seppola, M.; Uhlin-Hansen, L.; Steigen, S.E.; Hadler-Olsen, E. Presence of high-endothelial venules correlates with a favorable immune microenvironment in oral squamous cell carcinoma. *Mod. Pathol.* **2018**, *31*, 910–922.
68. Wong, Y.K.; Chang, K.W.; Cheng, C.Y.; Liu, C.J. Association of CTLA-4 gene polymorphism with oral squamous cell carcinoma. *J. Oral Pathol. Med.* **2006**, *35*, 51–54.
69. Wu, L.; Deng, W.W.; Huang, C.F.; Bu, L.L.; Yu, G.T.; Mao, L.; Zhang, W.F.; Liu, B.; Sun, Z.J. Expression of VISTA correlated with immunosuppression and synergized with CD8 to predict survival in human oral squamous cell carcinoma. *Cancer Immunol. Immunother.* **2017**, *66*, 627–636.
70. Wu, L.; Mao, L.; Liu, J.F.; Chen, L.; Yu, G.T.; Yang, L.L.; Wu, H.; Bu, L.L.; Kulkarni, A.B.; Zhang, W.F.; et al. Blockade of TIGIT/CD155 Signaling Reverses T-cell Exhaustion and Enhances Antitumor Capability in Head and Neck Squamous Cell Carcinoma. *Cancer Immunol. Res.* **2019**, *7*, 1700–1713.
71. Xu, B.; Jungbluth, A.A.; Frosina, D.; Alzumaili, B.; Aleynick, N.; Slodkowska, E.; Higgins, K.; Ho, A.; Morris, L.; Ghossein, R.; et al. The immune microenvironment and expression of PD-L1, PD-1, PRAME and MHC I in salivary duct carcinoma. *Histopathology* **2019**, *75*, 672–682.
72. Yagyuu, T.; Hatakeyama, K.; Imada, M.; Kurihara, M.; Matsusue, Y.; Yamamoto, K.; Obayashi, C.; Kiritani, T. Programmed death ligand 1 (PD-L1) expression and tumor microenvironment: Implications for patients with oral precancerous lesions. *Oral Oncol.* **2017**, *68*, 36–43.
73. Yang, L.L.; Mao, L.; Wu, H.; Chen, L.; Deng, W.W.; Xiao, Y.; Li, H.; Zhang, L.; Sun, Z.J. pDC depletion induced by CD317 blockade drives the antitumor immune response in head and neck squamous cell carcinoma. *Oral Oncol.* **2019**, *96*, 131–139.
74. Yoo, S.H.; Keam, B.; Ock, C.Y.; Kim, S.; Han, B.; Kim, J.W.; Lee, K.W.; Jeon, Y.K.; Jung, K.C.; Chung EJ et al.: Prognostic value of the association between MHC class I downregulation and PD-L1 upregulation in head and neck squamous cell carcinoma patients. *Sci. Rep.* **2019**, *9*, 7680.
75. Youngnak-Piboonratanakit, P.; Tsushima, F.; Otsuki, N.; Igarashi, H.; Machida, U.; Iwai, H.; Takahashi, Y.; Omura, K.; Yokozeki, H.; Azuma, M. The expression of B7-H1 on keratinocytes in chronic inflammatory mucocutaneous disease and its regulatory role. *Immunol. Lett.* **2004**, *94*, 215–222.
76. Zhou, G.; Zhang, J.; Ren, X.W.; Hu, J.Y.; Du, G.F.; Xu, X.Y. Increased B7-H1 expression on peripheral blood T cells in oral lichen planus correlated with disease severity. *J. Clin. Immunol.* **2012**, *32*, 794–801.
